# Supplementary material for: A Molecular and Co-Evolutionary Context for Grazer Induced Toxin Production in Alexandrium tamarense
Source: PLoS One. 2010 Nov 29;5(11):e15039. doi: 10.1371/journal.pone.0015039 (PMC2993940; doi:10.1371/journal.pone.0015039)
Supplement: Table S2 — Full list of regulated ESTs with annonations from the O. similis treatments with live copepods and respective cues. (XLS) [file pone.0015039.s002.xls]

## Sheet: Tabelle1
Differentially regulated ESTs from the copepod and copepod-cue treatment						Differentially regulated ESTs from the copepod treatment						Differentially regulated ESTs from the copepod-cue treatment
ProbeName	Fold change([Calanus] vs Zero)	Regulation([Calanus] vs Zero)	ESTName	Putative gene product		ProbeName	Fold change([Calanus] vs Zero)	Regulation([Calanus] vs Zero)	ESTName	Putative gene product		ProbeName	Fold change([Calanus] vs Zero)	Regulation([Calanus] vs Zero)	ESTName	Putative gene product
CUST_4179_PI235167212	1.56969	up	54437426	Actin		Amin_forward_09589	1.54643	up	alexandrium-C-a-85n03.m13r	delta carbonic anhydrase 1 (ca1)		Amin_forward_07476	1.82888	up	alexandrium-C-a-67c05.m13r	1,3-beta-glucan synthase component
CUST_536_PI234877732	1.59562	up	AosE010101P0002-x_A06	ATP-citrate synthase		CUST_8243_PI234877732	2.31625	up	AonE010101P0025-x_J17	DUF1768		Amin_forward_06399	1.5281	up	alexandrium-C-a-56i13.m13f	ADP-ribosylation factor
CUST_5223_PI234877732	1.69951	up	AonE010101P0003-x_N19	cAMP-dependent protein kinase regulatory subunit		Amin_forward_10014	1.68033	up	alexandrium-C-a-90c10.m13f	DUF23		CUST_7725_PI234877732	1.9385	up	AonE010101P0025-x_H10	Alexandrium fundyense unknown mRNA
Amin_forward_06299	1.52847	up	alexandrium-C-a-55f11.m13r	Ion transport protein		CUST_10578_PI234877732	1.50094	up	AonE010101P0025-x_K24	DUF3445		CUST_9508_PI234877732	1.84856	up	AonE010101P0007-x_B18	DEAD/DEAH box helicase
CUST_681_PI234877732	1.5873	up	AonE010101P0015-x_K21	Peridinin-chlorophyll a-binding protein		CUST_3855_PI235167212	1.77862	up	42752237	DUF410		CUST_9175_PI234877732	1.51542	up	AonE010101P0006-x_P15	efhand containing protein
Amin_forward_02337	1.71585	up	alexandrium-C-a-16e07.m13r	unknown/hypothetical protein		CUST_8810_PI234877732	2.11104	up	AonE010101P0002-x_F10	Microtubule associated protein 1A/1B, light chain 3		Amin_reverse_20899	1.5229	up	alexandrium-C-a-87j20.m13r	Endonuclease/Exonuclease/phosphatase family
Amin_forward_10728	1.80573	up	alexandrium-C-a-96f03.m13r	unknown/hypothetical protein		Amin_forward_05177	1.5097	up	alexandrium-C-a-45a06.m13r	NAD(p)-dependent steroid dehydrogenase-like protein		CUST_7703_PI234877732	1.50904	up	AonE010101P0030-x_D02	Fucoxanthin-chlorophyll a-c binding protein A
Amin_reverse_12419	1.53586	up	alexandrium-C-a-09d01.m13f	unknown/hypothetical protein		CUST_9753_PI235167212	1.69865	up	54438415	non-histone chromosomal protein		CUST_7735_PI234877732	1.55753	up	AonE010101P0011-x_E03	Glutamate-1-semialdehyde aminotransferase
CUST_10061_PI235167212	1.56484	up	42748657	unknown/hypothetical protein		CUST_7720_PI234877732	1.73222	up	AonE010101P0007-x_C06	PA (Protease associated) domain		CUST_9018_PI235167212	2.03759	up	42751342	glyceraldehyde-3-phosphate dehydrogenase
CUST_10532_PI235167212	1.50036	up	42748388	unknown/hypothetical protein		CUST_2602_PI234877732	1.56818	up	AonE010101P0005-x_J06	PUL domain		CUST_2776_PI234877732	1.52824	up	AonE010101P0020-x_B18	Invariant surface glycoprotein
CUST_2225_PI235167212	1.67107	up	42748045	unknown/hypothetical protein		CUST_6699_PI235167212	1.57585	up	42752198	Ribosomal_L13 / hypothetical		CUST_9313_PI234877732	1.51235	up	AonE010101P0024-x_O08	Ion transport protein
CUST_2279_PI234877732	1.71952	up	AonE010101P0015-x_M08	unknown/hypothetical protein		Amin_reverse_16652	1.54049	up	alexandrium-C-a-48i03.m13f	translation elongation factor EF-1 alpha/Tu		CUST_6886_PI234877732	2.52583	up	AonE010101P0003-x_G21	Phosphatidylinositol-4-phosphate 5-Kinase
CUST_4358_PI235167212	1.80973	up	42750032	unknown/hypothetical protein		Amin_forward_04548	1.802	up	alexandrium-C-a-39l24.m13f	Tub family protein		CUST_2846_PI234877732	1.87375	up	AonE010101P0026-x_P20	Probable E3 ubiquitin-protein ligase
CUST_6151_PI235167212	1.52726	up	40756196	unknown/hypothetical protein		Amin_forward_00146	1.59259	up	alexandrium-C-a-02c12.m13r	unknown/hypothetical protein		CUST_9108_PI234877732	1.7009	up	AonE010101P0028-x_O14	S-adenosylmethionine synthetase
CUST_6291_PI235167212	1.53431	up	42751014	unknown/hypothetical protein		Amin_forward_00758	1.76911	up	alexandrium-C-a-07b03.m13r	unknown/hypothetical protein		Amin_forward_05318	1.64353	up	alexandrium-C-a-46f10.m13r	Succinate dehydrogenase flavoprotein
CUST_7440_PI235167212	1.96921	up	42750599	unknown/hypothetical protein		Amin_forward_00805	1.52059	up	alexandrium-C-a-07c08.m13r	unknown/hypothetical protein		CUST_132_PI234877732	1.66397	up	AonE010101P0018-x_F19	tubulin alpha chain
CUST_7565_PI234877732	1.5385	up	AonE010101P0022-x_E17	unknown/hypothetical protein		Amin_forward_02711	1.59831	up	alexandrium-C-a-21a05.m13r	unknown/hypothetical protein		Amin_forward_01990	1.61937	up	alexandrium-C-a-12h08.m13r	unknown/hypothetical protein
CUST_8724_PI235167212	1.56135	up	58179644	unknown/hypothetical protein		Amin_forward_03904	1.51477	up	alexandrium-C-a-33d02.m13r	unknown/hypothetical protein		Amin_forward_02288	1.57642	up	alexandrium-C-a-16a05.m13r	unknown/hypothetical protein
CUST_9357_PI235167212	1.77651	up	40756525	unknown/hypothetical protein		Amin_forward_07029	1.53465	up	alexandrium-C-a-62h02.m13f	unknown/hypothetical protein		Amin_forward_07869	1.56518	up	alexandrium-C-a-70f03.m13r	unknown/hypothetical protein
CUST_5560_PI234877732	1.74864	up	AonE010101P0020-x_G14	Zinc finger, C3HC4 type (RING finger)		Amin_forward_07252	1.73893	up	alexandrium-C-a-65b12.m13f	unknown/hypothetical protein		Amin_forward_10152	1.52988	up	alexandrium-C-a-91k07.m13r	unknown/hypothetical protein
CUST_1947_PI234877732	1.53631	down	AonE010101P0001-x_M17	Adenylosuccinate lyase		Amin_forward_08173	1.65317	up	alexandrium-C-a-73d01.m13r	unknown/hypothetical protein		Amin_reverse_15070	1.80093	up	alexandrium-C-a-33f10.m13f	unknown/hypothetical protein
CUST_2944_PI234877732	1.55115	down	AonE010101P0006-x_O11	Alexandrium catenella mitochondrial cytb_6 and cox1_6 genes for cytochrome b, cytochrome c oxidase subunit 1		Amin_forward_09705	1.67325	up	alexandrium-C-a-86m10.m13r	unknown/hypothetical protein		Amin_reverse_21985	1.64279	up	alexandrium-C-a-97g01.m13r	unknown/hypothetical protein
CUST_5852_PI234877732	1.89374	down	AonE010101P0015-x_G07	C2 domain		Amin_reverse_14370	1.70053	up	alexandrium-C-a-26e16.m13r	unknown/hypothetical protein		CUST_10043_PI235167212	1.57459	up	38452602	unknown/hypothetical protein
CUST_1005_PI235167212	1.5309	down	54437611	Calpain family cysteine protease		Amin_reverse_14392	1.51042	up	alexandrium-C-a-26g10.m13r	unknown/hypothetical protein		CUST_10067_PI234877732	2.36252	up	AonE010101P0023-x_D23	unknown/hypothetical protein
Amin_reverse_19748	1.50708	down	alexandrium-C-a-77b06.m13f	Carbonic anhydrase		Amin_reverse_20877	1.63735	up	alexandrium-C-a-87f10.m13f	unknown/hypothetical protein		CUST_10198_PI235167212	1.55587	up	42751714	unknown/hypothetical protein
CUST_10433_PI234877732	1.57777	down	AonE010101P0015-x_J24	Citrate synthase		CUST_10058_PI234877732	1.6087	up	AonE010101P0023-x_K24	unknown/hypothetical protein		CUST_10363_PI235167212	1.61212	up	40757033	unknown/hypothetical protein
CUST_10101_PI234877732	1.61985	down	AosE010101P0003-x_E17	cox1		CUST_10075_PI234877732	1.87047	up	AonE010101P0003-x_K22	unknown/hypothetical protein		CUST_10706_PI234877732	1.66651	up	AonE010101P0021-x_B18	unknown/hypothetical protein
CUST_297_PI234877732	1.80196	down	AonE010101P0030-x_D03	DNA-3-methyladenine glycosylase		CUST_10116_PI235167212	1.6935	up	40755397	unknown/hypothetical protein		CUST_128_PI235167212	1.71164	up	42750970	unknown/hypothetical protein
Amin_reverse_16850	1.68382	down	alexandrium-C-a-50e14.m13r	Fucoxanthin-chlorophyll a-c binding protein B		CUST_1205_PI234877732	1.53456	up	AonE010101P0008-x_C12	unknown/hypothetical protein		CUST_1531_PI234877732	1.66118	up	AonE010101P0002-x_O14	unknown/hypothetical protein
CUST_4929_PI234877732	2.25686	down	AonE010101P0020-x_N16	large subunit ribosomal RNA		CUST_1279_PI234877732	1.57117	up	AonE010101P0001-x_J14	unknown/hypothetical protein		CUST_1999_PI234877732	2.59889	up	AonE010101P0017-x_M19	unknown/hypothetical protein
Amin_forward_05669	2.10144	down	alexandrium-C-a-49p03.m13f	Leucine carboxyl methyltransferase		CUST_1387_PI235167212	1.57487	up	40756558	unknown/hypothetical protein		CUST_2353_PI235167212	1.80863	up	54436586	unknown/hypothetical protein
CUST_72_PI235167212	1.54188	down	42751120	Major Facilitator Superfamily		CUST_1478_PI235167212	1.50787	up	38452863	unknown/hypothetical protein		CUST_2879_PI234877732	1.59556	up	AonE010101P0027-x_G01	unknown/hypothetical protein
CUST_6054_PI234877732	1.6366	down	AonE010101P0012-x_M05	Maribacter sp. ribosomal RNA gene		CUST_3258_PI235167212	1.86115	up	42750641	unknown/hypothetical protein		CUST_2918_PI234877732	1.56701	up	AonE010101P0020-x_H08	unknown/hypothetical protein
CUST_9506_PI234877732	1.60066	down	AonE010101P0023-x_I03	Peridinin-chlorophyll a-binding protein 1		CUST_3356_PI234877732	1.54039	up	AonE010101P0001-x_C24	unknown/hypothetical protein		CUST_2946_PI234877732	1.66705	up	AonE010101P0005-x_C01	unknown/hypothetical protein
CUST_811_PI234877732	2.78848	down	AonE010101P0016-x_D22	Protoceratium reticulatum 23S ribosomal RNA		CUST_3670_PI235167212	1.69941	up	38453266	unknown/hypothetical protein		CUST_3148_PI235167212	1.61374	up	37759883	unknown/hypothetical protein
Amin_reverse_15959	1.53339	down	alexandrium-C-a-42a22.m13f	Ribosomal RNA adenine dimethylase		CUST_3967_PI234877732	1.63244	up	AonE010101P0026-x_N02	unknown/hypothetical protein		CUST_3845_PI235167212	1.53325	up	42750671	unknown/hypothetical protein
CUST_8883_PI234877732	1.50925	down	AonE010101P0027-x_O07	SAM dependent methyltransferases		CUST_3994_PI234877732	1.98081	up	AonE010101P0016-x_D12	unknown/hypothetical protein		CUST_3978_PI235167212	1.66247	up	40754706	unknown/hypothetical protein
CUST_8043_PI235167212	1.802	down	54437645	small subunit ribosomal RNA gene		CUST_4030_PI235167212	1.6873	up	42749162	unknown/hypothetical protein		CUST_4243_PI235167212	1.86568	up	40759039	unknown/hypothetical protein
CUST_9932_PI234877732	1.5893	down	AonE010101P0028-x_O16	Sodium/calcium exchanger protein		CUST_4462_PI235167212	1.57586	up	42748551	unknown/hypothetical protein		CUST_4830_PI235167212	3.12716	up	42749368	unknown/hypothetical protein
CUST_765_PI234877732	1.57776	down	AonE010101P0010-x_D08	trehalose-6-phosphate synthase domain-containing protein		CUST_4791_PI235167212	1.66547	up	42750607	unknown/hypothetical protein		CUST_4963_PI235167212	1.83666	up	42750197	unknown/hypothetical protein
CUST_5315_PI234877732	1.95135	down	AonE010101P0025-x_D15	Uncultured bacterium ARCTIC06_E_09 genomic sequence		CUST_5273_PI235167212	2.07653	up	38452595	unknown/hypothetical protein		CUST_5427_PI235167212	1.66703	up	37648269	unknown/hypothetical protein
CUST_6029_PI234877732	2.3284	down	AonE010101P0015-x_F04	Uncultured bacterium clone 3G1G 23S ribosomal RNA gene, partial sequence		CUST_5381_PI234877732	1.71709	up	AonE010101P0024-x_D18	unknown/hypothetical protein		CUST_5776_PI234877732	2.00342	up	AonE010101P0002-x_M14	unknown/hypothetical protein
Amin_forward_01615	1.61122	down	alexandrium-C-a-101e04.m13f	unknown/hypothetical protein		CUST_6666_PI235167212	1.53123	up	42751691	unknown/hypothetical protein		CUST_6121_PI234877732	2.5011	up	AonE010101P0002-x_J19	unknown/hypothetical protein
Amin_forward_03177	1.51262	down	alexandrium-C-a-25l17.m13r	unknown/hypothetical protein		CUST_7618_PI235167212	1.59035	up	42752096	unknown/hypothetical protein		CUST_6274_PI235167212	2.18613	up	40759160	unknown/hypothetical protein
Amin_forward_03807	1.63608	down	alexandrium-C-a-32d11.m13r	unknown/hypothetical protein		CUST_8682_PI234877732	1.52165	up	AonE010101P0009-x_B07	unknown/hypothetical protein		CUST_6354_PI235167212	1.75848	up	38452524	unknown/hypothetical protein
Amin_forward_07711	1.6084	down	alexandrium-C-a-69c10.m13f	unknown/hypothetical protein		CUST_1738_PI234877732	1.70722	down	AonE010101P0006-x_B21	2-phosphoglycerate dehydratase		CUST_6506_PI235167212	1.74607	up	40756808	unknown/hypothetical protein
Amin_reverse_11605	1.76432	down	alexandrium-C-a-06a02.m13f	unknown/hypothetical protein		CUST_1699_PI234877732	1.65867	down	AonE010101P0009-x_B21	3-beta hydroxysteroid dehydrogenase/isomerase family		CUST_655_PI235167212	1.53471	up	40759472	unknown/hypothetical protein
Amin_reverse_12251	1.92977	down	alexandrium-C-a-08f03.m13r	unknown/hypothetical protein		Amin_forward_02356	1.50276	down	alexandrium-C-a-16g07.m13r	AFG1-like ATPase & efhands		CUST_6581_PI234877732	1.62612	up	AonE010101P0022-x_O21	unknown/hypothetical protein
Amin_reverse_12886	1.66023	down	alexandrium-C-a-10f09.m13f	unknown/hypothetical protein		CUST_3640_PI234877732	2.09079	down	AonE010101P0002-x_N20	Aldo/keto reductase family		CUST_6789_PI235167212	1.54486	up	58179921	unknown/hypothetical protein
Amin_reverse_13226	1.77891	down	alexandrium-C-a-14b03.m13r	unknown/hypothetical protein		CUST_8474_PI234877732	1.52238	down	AosE010101P0003-x_I07	Alexandrium catenella mitochondrial cytb_6 and cox1_6 genes for cytochrome b, cytochrome c oxidase subunit 1		CUST_702_PI235167212	1.50089	up	42750122	unknown/hypothetical protein
Amin_reverse_13672	1.51151	down	alexandrium-C-a-18g03.m13f	unknown/hypothetical protein		CUST_1268_PI234877732	1.82634	down	AonE010101P0028-x_L11	Alexandrium tamarense mRNA		CUST_7076_PI234877732	1.64158	up	AonE010101P0005-x_P09	unknown/hypothetical protein
Amin_reverse_17217	1.59662	down	alexandrium-C-a-53h08.m13f	unknown/hypothetical protein		CUST_10619_PI234877732	1.82417	down	AonE010101P0020-x_E12	Bestrophin		CUST_711_PI234877732	1.67637	up	AosE010101P0002-x_G11	unknown/hypothetical protein
Amin_reverse_19969	1.80937	down	alexandrium-C-a-79e01.m13f	unknown/hypothetical protein		CUST_8137_PI235167212	1.66275	down	42751602	Calmodulin		CUST_7164_PI234877732	1.88499	up	AonE010101P0017-x_A02	unknown/hypothetical protein
Amin_reverse_20674	1.63034	down	alexandrium-C-a-85h01.m13r	unknown/hypothetical protein		CUST_3359_PI234877732	1.59876	down	AonE010101P0008-x_F07	cell wall-associated hydrolase		CUST_7321_PI235167212	1.85461	up	42751789	unknown/hypothetical protein
CUST_1000_PI234877732	1.58785	down	AonE010101P0021-x_L19	unknown/hypothetical protein		Amin_reverse_20583	1.51909	down	alexandrium-C-a-84k23.m13r	chloroplast light harvesting complex protein		CUST_7558_PI235167212	1.76627	up	54436926	unknown/hypothetical protein
CUST_10437_PI235167212	1.56472	down	38452146	unknown/hypothetical protein		Amin_reverse_18496	2.40139	down	alexandrium-C-a-66c09.m13f	cytochrome P450		CUST_7641_PI235167212	1.69064	up	38453087	unknown/hypothetical protein
CUST_10598_PI235167212	2.28948	down	54438162	unknown/hypothetical protein		CUST_10554_PI234877732	1.74924	down	AonE010101P0021-x_C13	DUF2414		CUST_8037_PI235167212	1.63511	up	38452128	unknown/hypothetical protein
CUST_1139_PI234877732	1.63029	down	AonE010101P0002-x_M21	unknown/hypothetical protein		CUST_5506_PI234877732	1.56834	down	AonE010101P0026-x_G14	efhand containing protein		CUST_8094_PI235167212	1.83793	up	40756565	unknown/hypothetical protein
CUST_1524_PI234877732	1.66222	down	AonE010101P0024-x_N20	unknown/hypothetical protein		CUST_8160_PI234877732	1.52093	down	AonE010101P0024-x_P15	efhand containing protein & Secreted protein acidic and rich in cysteine Ca binding region		CUST_8192_PI235167212	2.40604	up	38452150	unknown/hypothetical protein
CUST_2004_PI235167212	1.70682	down	38453034	unknown/hypothetical protein		Amin_reverse_16545	1.77059	down	alexandrium-C-a-47e09.m13r	Elongation factor Tu C-terminal domain		CUST_836_PI234877732	2.00256	up	AonE010101P0010-x_I02	unknown/hypothetical protein
CUST_2068_PI235167212	1.86701	down	40755404	unknown/hypothetical protein		Amin_forward_01365	1.62816	down	alexandrium-C-a-09f09.m13f	emp24/gp25L/p24 family/GOLD		CUST_8403_PI235167212	2.09345	up	40756938	unknown/hypothetical protein
CUST_2341_PI234877732	1.50502	down	AonE010101P0022-x_F18	unknown/hypothetical protein		CUST_1514_PI234877732	1.52986	down	AonE010101P0013-x_G07	flagellar outer dynein arm heavy chain beta		CUST_9127_PI235167212	1.61916	up	42748253	unknown/hypothetical protein
CUST_2353_PI234877732	1.67341	down	AonE010101P0015-x_L07	unknown/hypothetical protein		Amin_forward_00876	1.79658	down	alexandrium-C-a-07e12.m13f	Glycosyl transferases group 1 protein		CUST_9938_PI235167212	1.73178	up	38452336	unknown/hypothetical protein
CUST_2461_PI234877732	1.98457	down	AonE010101P0018-x_F22	unknown/hypothetical protein		Amin_forward_09037	1.78344	down	alexandrium-C-a-81c20.m13f	Glycosyltransferase family 29 (sialyltransferase)		CUST_9951_PI234877732	2.15798	up	AonE010101P0016-x_C02	unknown/hypothetical protein
CUST_2623_PI235167212	1.5418	down	54437775	unknown/hypothetical protein		CUST_1780_PI235167212	1.73333	down	58179744	Kinesin motor domain containing protein		CUST_10531_PI234877732	1.908	down	AonE010101P0009-x_I23	60Kd inner membrane protein
CUST_2736_PI235167212	1.59102	down	42749439	unknown/hypothetical protein		Amin_reverse_18883	1.51841	down	alexandrium-C-a-69f09.m13r	LSU rRNA		Amin_forward_02813	1.82808	down	alexandrium-C-a-22a05.m13r	Acetyltransferase (GNAT) family
CUST_3853_PI235167212	1.61527	down	42751756	unknown/hypothetical protein		CUST_2958_PI234877732	1.50192	down	AonE010101P0024-x_H23	NAD(p)-dependent steroid dehydrogenase-like protein		CUST_2246_PI234877732	1.71486	down	AonE010101P0004-x_F14	Actin
CUST_410_PI234877732	1.81769	down	AonE010101P0004-x_P14	unknown/hypothetical protein		Amin_forward_07822	1.61219	down	alexandrium-C-a-70c06.m13r	Neurotransmitter-gated ion-channel transmembrane region		CUST_10686_PI234877732	1.68635	down	AonE010101P0018-x_I08	alcohol dehydrogenase, zinc binding
CUST_4231_PI234877732	1.72167	down	AonE010101P0011-x_F11	unknown/hypothetical protein		Amin_forward_05699	1.54502	down	alexandrium-C-a-50c10.m13r	Pentatricopeptide repeat-containing protein		Amin_forward_01989	1.60551	down	alexandrium-C-a-12h07.m13r	Alpha-kinase family (& Peptidase_C1_2)
CUST_5055_PI234877732	1.83986	down	AonE010101P0010-x_P18	unknown/hypothetical protein		CUST_10088_PI234877732	1.51764	down	AonE010101P0012-x_H24	Peridinin-chlorophyll a-binding protein 1		CUST_3844_PI234877732	2.10878	down	AosE010101P0003-x_J11	cox1
CUST_5840_PI235167212	1.65355	down	38453243	unknown/hypothetical protein		CUST_2798_PI234877732	1.5087	down	AonE010101P0001-x_O11	Peridinin-chlorophyll a-binding protein 1		Amin_forward_09415	1.89495	down	alexandrium-C-a-84g13.m13r	DEAD/DEAH box helicase family protein / Helicase_C protein
CUST_6045_PI234877732	1.59637	down	AosE010101P0002-x_L16	unknown/hypothetical protein		CUST_7075_PI234877732	1.67891	down	AonE010101P0027-x_K09	Peridinin-chlorophyll a-binding protein 1		CUST_8500_PI234877732	1.70474	down	AonE010101P0016-x_I18	DnaJ domain
CUST_6107_PI235167212	2.22736	down	40755155	unknown/hypothetical protein		CUST_6571_PI234877732	1.63352	down	AonE010101P0020-x_A23	Phosphatidylinositol-4-phosphate 5-Kinase		Amin_forward_02136	1.65229	down	alexandrium-C-a-14d10.m13f	Dual specificity phosphatase, catalytic domain
CUST_7072_PI234877732	1.50105	down	AonE010101P0013-x_A20	unknown/hypothetical protein		Amin_reverse_19522	1.61169	down	alexandrium-C-a-75b08.m13r	Phosphomannomutase		Amin_forward_04830	1.8829	down	alexandrium-C-a-42a24.m13r	Ergosterol biosynthesis ERG4/ERG24 family protein
CUST_7585_PI234877732	1.52439	down	AonE010101P0026-x_N07	unknown/hypothetical protein		CUST_7033_PI234877732	1.70325	down	AonE010101P0029-x_J11	Protein transport protein Sec61 subunit alpha		CUST_87_PI234877732	1.59056	down	AonE010101P0027-x_D03	Farnesyl pyrophosphate synthetase
CUST_7605_PI234877732	1.51711	down	AonE010101P0016-x_O24	unknown/hypothetical protein		Amin_forward_04623	1.59425	down	alexandrium-C-a-40e21.m13r	Putative esterase		Amin_reverse_16436	1.67313	down	alexandrium-C-a-46e04.m13f	Fucoxanthin-chlorophyll a-c binding protein A
CUST_9238_PI235167212	1.67914	down	38453338	unknown/hypothetical protein		CUST_5675_PI234877732	1.5094	down	AosE010101P0002-x_K20	Tyrosinase		CUST_5455_PI234877732	2.72226	down	AonE010101P0009-x_J09	Glutathione S-transferase
CUST_9252_PI235167212	1.50391	down	58179840	unknown/hypothetical protein		Amin_forward_09318	1.59243	down	alexandrium-C-a-83f12.m13r	UDP-glucoronosyl and UDP-glucosyl transferase		CUST_10686_PI235167212	2.87683	down	42751575	integral membrane protein
CUST_9729_PI235167212	1.61693	down	40758570	unknown/hypothetical protein		Amin_forward_01410	1.9483	down	alexandrium-C-a-09h02.m13f	unknown/hypothetical protein		Amin_reverse_11893	1.50031	down	alexandrium-C-a-07b04.m13r	IQ calmodulin-binding motif (and PDZ domain)
						Amin_forward_03185	1.54633	down	alexandrium-C-a-25p03.m13r	unknown/hypothetical protein		CUST_2398_PI234877732	2.31578	down	AonE010101P0022-x_G10	Karlodinium micrum unknown mRNA sequence; mitochondrial
						Amin_forward_03803	1.57945	down	alexandrium-C-a-32d06.m13r	unknown/hypothetical protein		CUST_6729_PI234877732	1.85495	down	AonE010101P0030-x_A05	KH domain
						Amin_forward_04749	1.51566	down	alexandrium-C-a-41f23.m13r	unknown/hypothetical protein		CUST_694_PI235167212	1.80226	down	54438158	KH domain
						Amin_forward_07857	1.60513	down	alexandrium-C-a-70e08.m13r	unknown/hypothetical protein		CUST_1866_PI234877732	2.6903	down	AonE010101P0016-x_C04	large subunit ribosomal RNA
						Amin_forward_08559	1.53618	down	alexandrium-C-a-76g01.m13f	unknown/hypothetical protein		CUST_9511_PI234877732	2.45581	down	AonE010101P0010-x_C12	large subunit ribosomal RNA
						Amin_forward_10639	1.77725	down	alexandrium-C-a-96a05.m13r	unknown/hypothetical protein		CUST_10614_PI234877732	1.68725	down	AonE010101P0017-x_D18	Methionine aminopeptidase 2
						Amin_reverse_15190	1.5146	down	alexandrium-C-a-34h08.m13f	unknown/hypothetical protein		CUST_1032_PI234877732	1.83807	down	AonE010101P0001-x_F01	Mitogen-activated protein kinase kinase 1
						Amin_reverse_15374	1.55951	down	alexandrium-C-a-36m03.m13f	unknown/hypothetical protein		Amin_forward_06614	1.67822	down	alexandrium-C-a-58k10.m13r	Nucleotidyltransferase domain
						Amin_reverse_19152	1.53469	down	alexandrium-C-a-72a09.m13f	unknown/hypothetical protein		CUST_8357_PI234877732	1.62715	down	AonE010101P0023-x_G07	Papain family cysteine protease containing protein
						CUST_10720_PI235167212	1.70007	down	40757821	unknown/hypothetical protein		CUST_5769_PI235167212	2.31478	down	58180090	Peridinin-chlorophyll A binding protein
						CUST_1076_PI234877732	2.14169	down	AonE010101P0019-x_F06	unknown/hypothetical protein		CUST_7691_PI234877732	1.70435	down	AonE010101P0030-x_N24	Peridinin-chlorophyll a-binding protein 1
						CUST_152_PI235167212	1.50691	down	40755627	unknown/hypothetical protein		Amin_reverse_15558	1.69722	down	alexandrium-C-a-38e08.m13r	PPR repeat
						CUST_1680_PI234877732	1.60309	down	AonE010101P0023-x_I17	unknown/hypothetical protein		CUST_5468_PI234877732	2.65859	down	AonE010101P0022-x_J10	PQQ enzyme repeat
						CUST_2147_PI235167212	1.61628	down	40757738	unknown/hypothetical protein		CUST_5890_PI234877732	1.94573	down	AonE010101P0030-x_J13	PQQ enzyme repeat
						CUST_284_PI235167212	1.51488	down	38452515	unknown/hypothetical protein		Amin_forward_01564	1.55482	down	alexandrium-C-a-101b05.m13f	PRA1 family protein
						CUST_2854_PI234877732	1.50358	down	AonE010101P0020-x_P13	unknown/hypothetical protein		CUST_6715_PI234877732	1.54581	down	AonE010101P0015-x_F01	Rhodopsin-like GPCR transmembrane domain
						CUST_3145_PI235167212	1.52736	down	40759703	unknown/hypothetical protein		CUST_6678_PI234877732	2.38902	down	AonE010101P0004-x_M16	serine/threonine protein phosphatase
						CUST_3284_PI234877732	1.64673	down	AonE010101P0018-x_H01	unknown/hypothetical protein		CUST_781_PI234877732	1.58383	down	AonE010101P0021-x_G15	serine/threonine protein phosphatase
						CUST_3680_PI235167212	2.14714	down	42749900	unknown/hypothetical protein		CUST_9114_PI234877732	2.07908	down	AonE010101P0006-x_P08	Signal peptide binding domain
						CUST_4297_PI235167212	1.52124	down	42749151	unknown/hypothetical protein		CUST_9629_PI235167212	1.79449	down	42751267	STAS (after Sulphate Transporter and AntiSigma factor antagonist) domain
						CUST_4476_PI234877732	1.61151	down	AonE010101P0025-x_J01	unknown/hypothetical protein		CUST_2698_PI234877732	1.81014	down	AonE010101P0014-x_P13	Transmembrane amino acid transporter protein
						CUST_4560_PI235167212	1.60214	down	54437225	unknown/hypothetical protein		CUST_495_PI234877732	1.81807	down	AonE010101P0021-x_H21	Tyrosinase
						CUST_4905_PI235167212	1.52996	down	42750316	unknown/hypothetical protein		Amin_forward_02570	1.5463	down	alexandrium-C-a-19c10.m13f	unknown/hypothetical protein
						CUST_5138_PI234877732	1.56153	down	AonE010101P0021-x_P11	unknown/hypothetical protein		Amin_forward_03245	2.48641	down	alexandrium-C-a-26f02.m13f2	unknown/hypothetical protein
						CUST_5291_PI234877732	1.81672	down	AonE010101P0005-x_A11	unknown/hypothetical protein		Amin_forward_06880	1.9207	down	alexandrium-C-a-61d07.m13r	unknown/hypothetical protein
						CUST_544_PI234877732	1.66116	down	AonE010101P0004-x_C01	unknown/hypothetical protein		Amin_forward_06964	2.11038	down	alexandrium-C-a-62c10.m13r	unknown/hypothetical protein
						CUST_5700_PI235167212	1.7142	down	42752013	unknown/hypothetical protein		Amin_forward_07479	1.612	down	alexandrium-C-a-67c06.m13f	unknown/hypothetical protein
						CUST_5706_PI234877732	1.59225	down	AonE010101P0028-x_F15	unknown/hypothetical protein		Amin_reverse_11765	1.73738	down	alexandrium-C-a-06f05.m13f	unknown/hypothetical protein
						CUST_5730_PI235167212	1.7722	down	40757712	unknown/hypothetical protein		Amin_reverse_12339	1.84372	down	alexandrium-C-a-09a08.m13r	unknown/hypothetical protein
						CUST_6038_PI235167212	1.5039	down	40758804	unknown/hypothetical protein		Amin_reverse_15975	1.81441	down	alexandrium-C-a-42c10.m13f	unknown/hypothetical protein
						CUST_6135_PI234877732	1.64639	down	AonE010101P0002-x_D03	unknown/hypothetical protein		Amin_reverse_19463	1.60509	down	alexandrium-C-a-74f12.m13f	unknown/hypothetical protein
						CUST_6255_PI235167212	1.62832	down	40756403	unknown/hypothetical protein		Amin_reverse_20057	1.93642	down	alexandrium-C-a-80b07.m13f	unknown/hypothetical protein
						CUST_667_PI235167212	1.51245	down	38451949	unknown/hypothetical protein		Amin_reverse_21894	1.98782	down	alexandrium-C-a-96h08.m13r2	unknown/hypothetical protein
						CUST_6833_PI235167212	1.50687	down	42748618	unknown/hypothetical protein		CUST_10120_PI234877732	1.58305	down	AonE010101P0016-x_M14	unknown/hypothetical protein
						CUST_702_PI235167212	1.84658	down	42750122	unknown/hypothetical protein		CUST_10173_PI234877732	2.12474	down	AonE010101P0015-x_O10	unknown/hypothetical protein
						CUST_7122_PI234877732	1.53082	down	AosE010101P0002-x_G02	unknown/hypothetical protein		CUST_10195_PI234877732	1.97797	down	AonE010101P0025-x_A16	unknown/hypothetical protein
						CUST_7334_PI234877732	1.66664	down	AonE010101P0018-x_G07	unknown/hypothetical protein		CUST_10297_PI235167212	2.14183	down	38452159	unknown/hypothetical protein
						CUST_7359_PI234877732	1.52881	down	AonE010101P0007-x_K08	unknown/hypothetical protein		CUST_10433_PI235167212	1.97237	down	40758251	unknown/hypothetical protein
						CUST_7524_PI235167212	1.558	down	38452799	unknown/hypothetical protein		CUST_10592_PI235167212	1.86473	down	40756356	unknown/hypothetical protein
						CUST_7812_PI235167212	1.53387	down	54436944	unknown/hypothetical protein		CUST_1274_PI234877732	2.13156	down	AonE010101P0022-x_L04	unknown/hypothetical protein
						CUST_7836_PI235167212	1.61534	down	40756322	unknown/hypothetical protein		CUST_1291_PI235167212	1.56782	down	42750229	unknown/hypothetical protein
						CUST_8040_PI235167212	1.53025	down	42749311	unknown/hypothetical protein		CUST_1520_PI235167212	1.57595	down	54436291	unknown/hypothetical protein
						CUST_8091_PI234877732	1.50151	down	AonE010101P0019-x_F07	unknown/hypothetical protein		CUST_1832_PI234877732	1.53715	down	AonE010101P0007-x_P24	unknown/hypothetical protein
						CUST_8298_PI234877732	1.57571	down	AonE010101P0023-x_K06	unknown/hypothetical protein		CUST_1957_PI235167212	2.00859	down	38452965	unknown/hypothetical protein
						CUST_8341_PI235167212	1.52418	down	42748210	unknown/hypothetical protein		CUST_2289_PI235167212	2.03427	down	38453265	unknown/hypothetical protein
						CUST_8429_PI235167212	1.74967	down	54437350	unknown/hypothetical protein		CUST_2401_PI235167212	1.90494	down	42751803	unknown/hypothetical protein
						CUST_878_PI235167212	1.52991	down	42748769	unknown/hypothetical protein		CUST_2621_PI235167212	1.61694	down	40757693	unknown/hypothetical protein
						CUST_9820_PI234877732	1.51797	down	AonE010101P0014-x_J14	unknown/hypothetical protein		CUST_2722_PI235167212	1.74322	down	54438620	unknown/hypothetical protein
						CUST_9903_PI235167212	1.50273	down	42748106	unknown/hypothetical protein		CUST_3055_PI235167212	1.96543	down	38453121	unknown/hypothetical protein
						Amin_forward_08807	1.56847	down	alexandrium-C-a-79a15.m13f	Zinc finger, C3HC4 type (RING finger)		CUST_3257_PI234877732	2.29985	down	AonE010101P0029-x_C15	unknown/hypothetical protein
												CUST_3347_PI235167212	1.95355	down	42748129	unknown/hypothetical protein
												CUST_3614_PI235167212	2.16877	down	38452628	unknown/hypothetical protein
												CUST_3998_PI234877732	1.86318	down	AonE010101P0002-x_B17	unknown/hypothetical protein
												CUST_4100_PI235167212	1.84679	down	58179612	unknown/hypothetical protein
												CUST_4613_PI235167212	1.62027	down	54437628	unknown/hypothetical protein
												CUST_538_PI235167212	1.55771	down	42750107	unknown/hypothetical protein
												CUST_5626_PI235167212	1.93219	down	40755777	unknown/hypothetical protein
												CUST_5664_PI234877732	2.27014	down	AosE010101P0002-x_J10	unknown/hypothetical protein
												CUST_5673_PI235167212	1.67567	down	42749387	unknown/hypothetical protein
												CUST_5690_PI235167212	1.74209	down	42749987	unknown/hypothetical protein
												CUST_5763_PI234877732	2.5926	down	AonE010101P0016-x_P21	unknown/hypothetical protein
												CUST_6076_PI234877732	1.61096	down	AonE010101P0015-x_M12	unknown/hypothetical protein
												CUST_6085_PI235167212	2.21371	down	42748464	unknown/hypothetical protein
												CUST_6106_PI235167212	1.51535	down	42750074	unknown/hypothetical protein
												CUST_679_PI235167212	1.94504	down	42749221	unknown/hypothetical protein
												CUST_7180_PI234877732	1.59244	down	AonE010101P0019-x_J09	unknown/hypothetical protein
												CUST_7256_PI234877732	1.59075	down	AonE010101P0025-x_M03	unknown/hypothetical protein
												CUST_7685_PI235167212	1.6979	down	42749701	unknown/hypothetical protein
												CUST_7741_PI234877732	2.02268	down	AonE010101P0003-x_B03	unknown/hypothetical protein
												CUST_8319_PI234877732	1.9306	down	AonE010101P0018-x_O14	unknown/hypothetical protein
												CUST_8939_PI235167212	2.23391	down	38453326	unknown/hypothetical protein
												CUST_9092_PI235167212	1.64106	down	42748525	unknown/hypothetical protein
												CUST_9110_PI234877732	1.57046	down	AonE010101P0023-x_L23	unknown/hypothetical protein
												CUST_9170_PI235167212	1.70341	down	42750908	unknown/hypothetical protein
												CUST_9417_PI235167212	1.58508	down	40758031	unknown/hypothetical protein
												CUST_984_PI234877732	1.59369	down	AonE010101P0024-x_F03	unknown/hypothetical protein
												CUST_9956_PI235167212	2.22517	down	42749225	unknown/hypothetical protein
												CUST_10294_PI234877732	2.53602	down	AonE010101P0001-x_I01	YchF-GTPase_C / could function as a GTP-dependent translation factor.
